# Supplementary material
Source: PubMed Central journal article supplement (PMC4713357)
Supplement: NIHMS706963-supplement-Supplementary.pdf [file NIHMS706963-supplement-Supplementary.pdf]

# Concentration-Independent MRI of pH with a Dendrimer-Based pH Responsive Nanoprobe

Mohammed PI. Bhuiyan<sup>[a]</sup>, Madhava P. Aryal<sup>[a]</sup>, Branislava Janic<sup>[a]</sup>, Kishor Kitar<sup>[a]</sup>, Nadimpalli RS. Varma<sup>[a]</sup>, James R. Ewing<sup>[a]</sup>, Ali S. Arbab,<sup>[b]</sup> and Meser M. Ali<sup>\*[a]</sup>

## Supplementary Section:

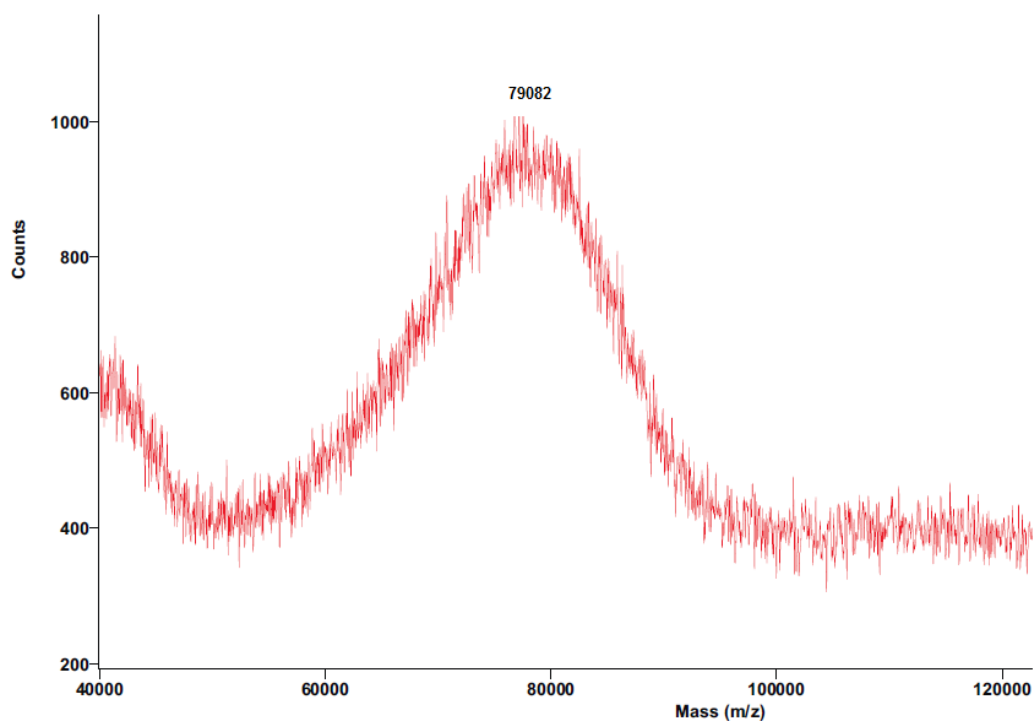

**Figure S1:** Maldi-tof analysis of (p-SCN-DOTA-4AmPE)<sup>[45]</sup> conjugated G5 PAMAM dendrimer. The average number of conjugate DOTA-4AmPE chelates was estimated to be 44 per dendrimer.
